# Supplementary material for: Visible-LEDs-induced photocatalytic activity of Bi2WO6/BiVO4heterojunctions prepared by a novel and green methodology
Source: Royal Society of Chemistry journal article supplement (doi:10.1039/d3nj01024d), 2023-01-01
Supplement: d3nj01024d1.pdf [file d3nj01024d1.pdf]

**Visible-LEDs-induced photocatalytic activity of Bi<sub>2</sub>WO<sub>6</sub>/BiVO<sub>4</sub> heterojunctions prepared  
by a novel and green methodology**

Sonia Judith Segovia-Sandoval<sup>1</sup>, Esmeralda Mendoza-Mendoza<sup>2,3,4\*</sup>, Araceli Jacobo-Azuara<sup>1</sup>,  
Roberto Leyva-Ramos<sup>2</sup>, Hiram Joazet Ojeda-Galván<sup>5,3</sup>, Joelis Rodríguez-Hernández<sup>6</sup>, Ignacio  
René Galindo-Esquivel<sup>1</sup>

<sup>1</sup>División de Ciencias Naturales y Exactas, Departamento de Química, Universidad de Guanajuato,  
Col. Noria Alta S/N, Guanajuato GTO 36050, México.

<sup>2</sup>Facultad de Ciencias Químicas, Universidad Autónoma de San Luis Potosí, Dr. M. Nava 6, San  
Luis Potosí SLP 78210, México.

<sup>3</sup>Microscopia de Alta Resolución, Centro de Investigación en Ciencias de la Salud y  
Biomedicina, Universidad Autónoma de San Luis Potosí, Av. Sierra Leona 550, San Luis Potosí  
SLP 78210, México.

<sup>4</sup>Investigadores por México-CONACYT

<sup>5</sup>Facultad de Ciencias, Universidad Autónoma de San Luis Potosí, Av. Parque Chapultepec  
1570, San Luis Potosí SLP 78210, México.

<sup>6</sup>Departamento de Materiales Avanzados, Centro de Investigación en Química Aplicada, Blvd.  
Enrique Reyna Hermosillo 140, Saltillo COAH 25294, México.

Correspondence to: E. Mendoza-Mendoza, Facultad de Ciencias, Químicas, Universidad  
Autónomas de  
San Luis Potosí, Dr. M. Nava 6, San Luis Potosí SLP 78210, México.

E-mail addresses: [esmeralda.mendoza@uaslp.mx](mailto:esmeralda.mendoza@uaslp.mx); [esme\\_mendoza@hotmail.com](mailto:esme_mendoza@hotmail.com) (E. Mendoza-  
Mendoza).

**Table S1.** Atomic % of elements calculated through XPS and key molar ratios to determine the formulation of the BiW, BiV, and Ag/1BiW/1BiV catalysts.

| Catalyst     | Atomic % |      |      |       |      |       | Molar ratios |      |                                       |
|--------------|----------|------|------|-------|------|-------|--------------|------|---------------------------------------|
|              | Bi       |      | W    | V     | Ag   | O     | O/(Bi+Me1)*  | O/Bi | Me2/Bi&                               |
|              | A#       | B#   |      |       |      |       |              |      |                                       |
| BiW          | 20.50    | 1.49 | 9.48 |       |      | 68.53 | 2.18         | 3.12 | 0.43                                  |
| BiV          | 15.74    |      |      | 16.31 |      | 61.04 | 2.12         | 4.32 | 1.04                                  |
| Ag/1BiW/1BiV | 17.96    | 1.17 | 4.36 | 9.48  | 1.18 | 58.86 | 1.99         | 3.44 | 0.23 <sup>a</sup> , 0.50 <sup>b</sup> |

Me1 refers to W in BiW, V in BiV and both W+V in Ag/1BiW/1BiV. & Me2 refers to W in BiW, V in BiV and either W<sup>a</sup> or V<sup>b</sup> in Ag/1BiW/1BiV. # Two different species of Bi were identified in BiW and Ag/1BiW/1BiV and are quantified separately as A and B.

**Table S2.** Binding energy summary of the three samples.

| Catalyst     | Binding Energy (eV) |                   |                   |                   |                   |                   |                   |                   |                   |                   |        |
|--------------|---------------------|-------------------|-------------------|-------------------|-------------------|-------------------|-------------------|-------------------|-------------------|-------------------|--------|
|              | Bi                  |                   |                   |                   | W                 |                   | V                 |                   | Ag                |                   | O      |
|              | 4f <sub>7/2</sub>   | 4f <sub>5/2</sub> | 4f <sub>7/2</sub> | 4f <sub>5/2</sub> | 4f <sub>7/2</sub> | 4f <sub>5/2</sub> | 2p <sub>3/2</sub> | 2p <sub>1/2</sub> | 3d <sub>5/2</sub> | 3d <sub>3/2</sub> | 1s     |
| BiW          | 158.85              | 164.16            | 156.52            | 161.9             | 35.11             | 37.26             |                   |                   |                   |                   | 529.85 |
| BiV          | 158.96              | 164.27            |                   |                   |                   |                   | 516.70            | 524.20            |                   |                   | 529.82 |
| Ag/1BiW/1BiV | 158.96              | 164.26            | 156.90            | 162.3             | 35.14             | 37.29             | 516.69            | 524.27            | 367.93            | 373.93            | 529.96 |

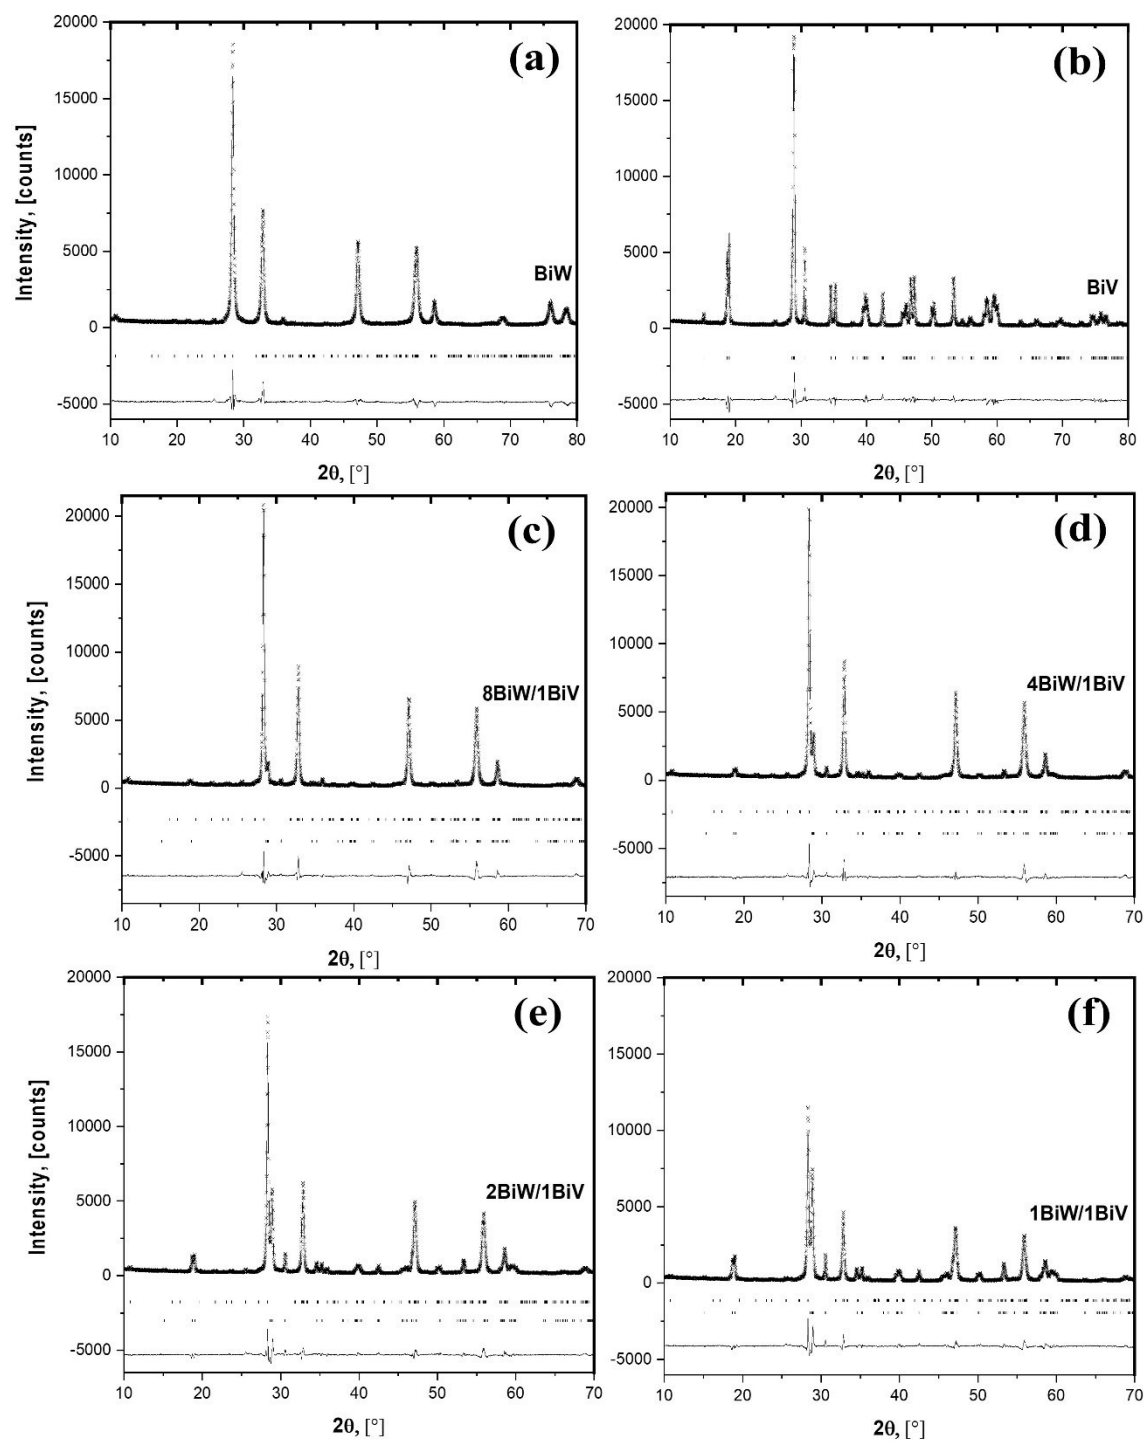

**Fig. S1.** Final Rietveld fitting of the XRD patterns of the as-prepared photocatalysts (a-f) showing the observed (crosses), calculated (full line), difference profiles (lower trace), and Bragg peak position (vertical line) of the  $\text{Bi}_2\text{WO}_6$  and  $\text{BiVO}_4$  phases.

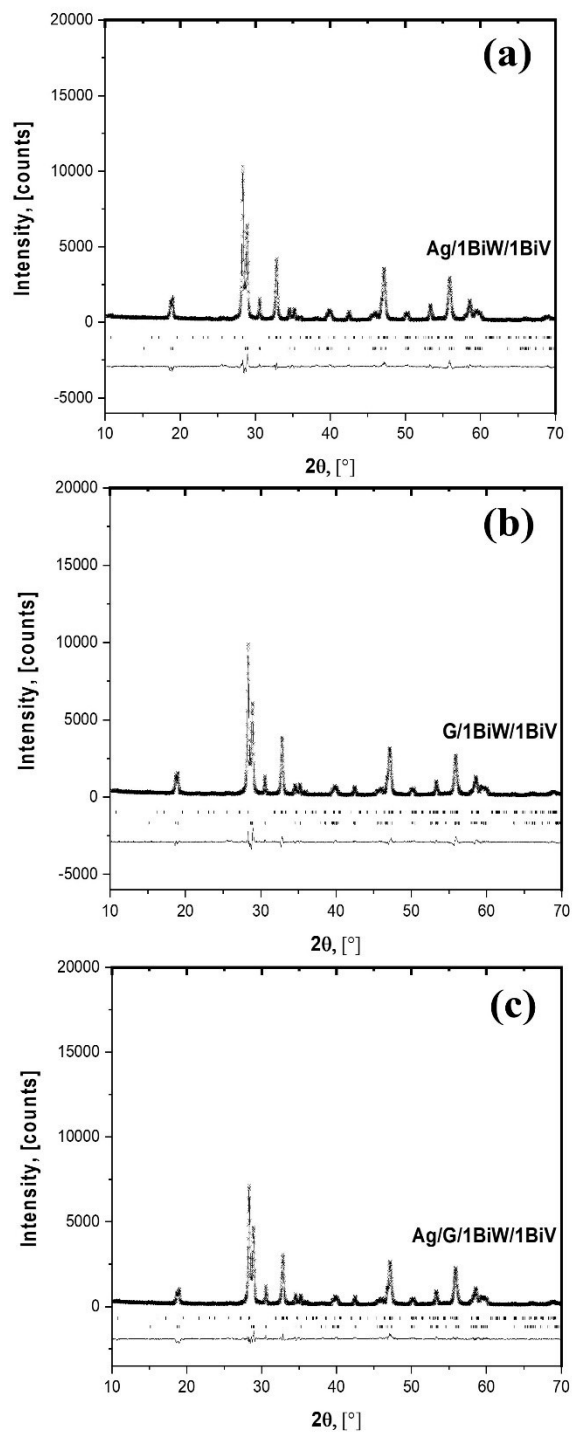

**Fig. S2.** Final Rietveld fitting of the XRD patterns of the 1BiW/1BiV heterojunction decorated with Ag-NPs and G (a-c) showing the observed (crosses), calculated (full line), difference profiles (lower trace), and Bragg peak position (vertical line) of the  $\text{Bi}_2\text{WO}_6$  and  $\text{BiVO}_4$  phases.

---

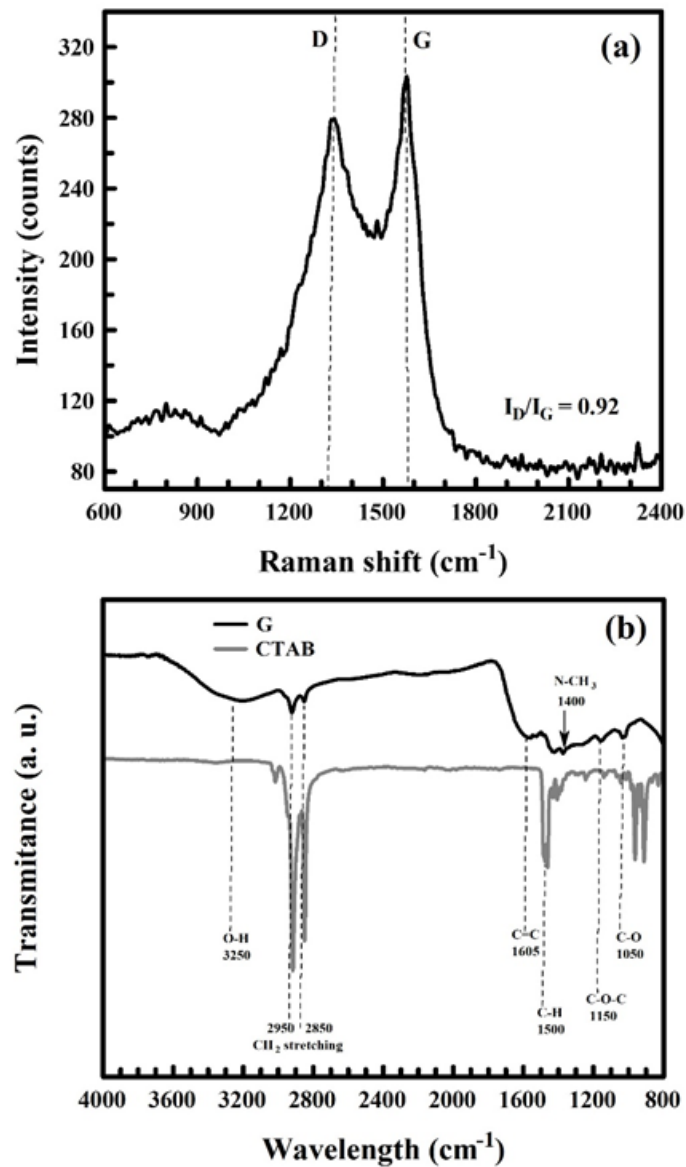

**Fig. S3.** Raman spectra of graphene (a), and FTIR spectra of graphene (b).

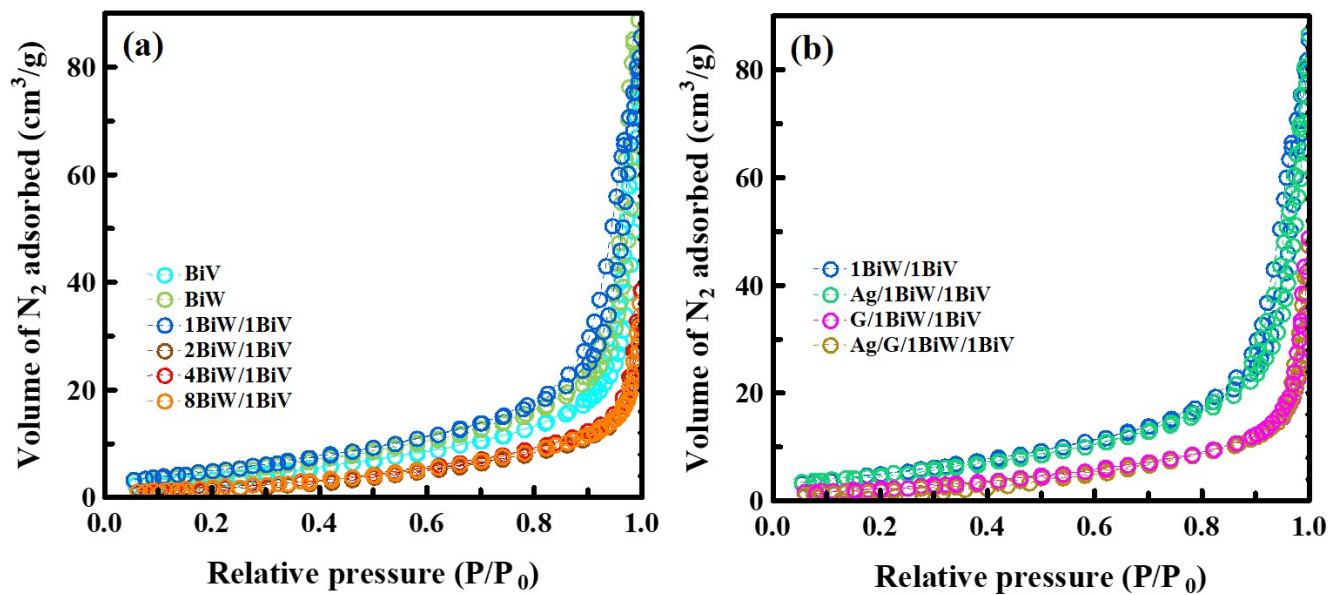

**Fig. S4.**  $N_2$  adsorption-desorption isotherms at 77 K on BiV, BiW, 8BiW/1BiV, 4BiW/1BiV, 2BiW/1BiV, 1BiW/1BiV (a), and 1BiW/1BiV (a) decorated with Ag-NPs and G (b).

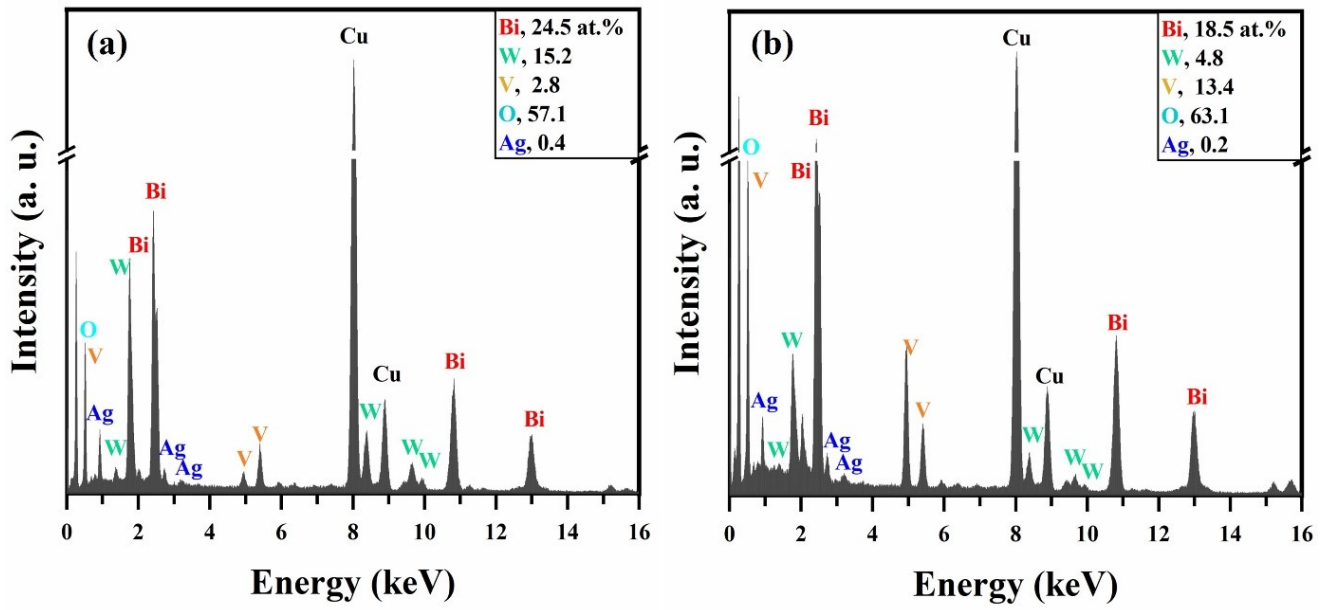

**Fig. S5.** EDX spectra of Ag/1BiW/1BiV confirmed the existence of Bi, W, V, O and Ag elements and the quantitative composition. EDX spectra are related to the areas depicted in Fig. 5 (b) and (c).



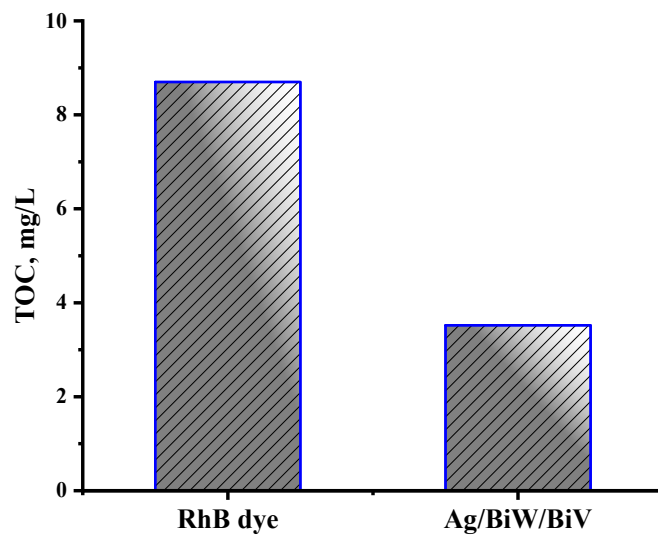

**Fig. S6.** TOC removal during the RhB photocatalytic degradation using Ag/1BiW/1BiV heterojunction.

---

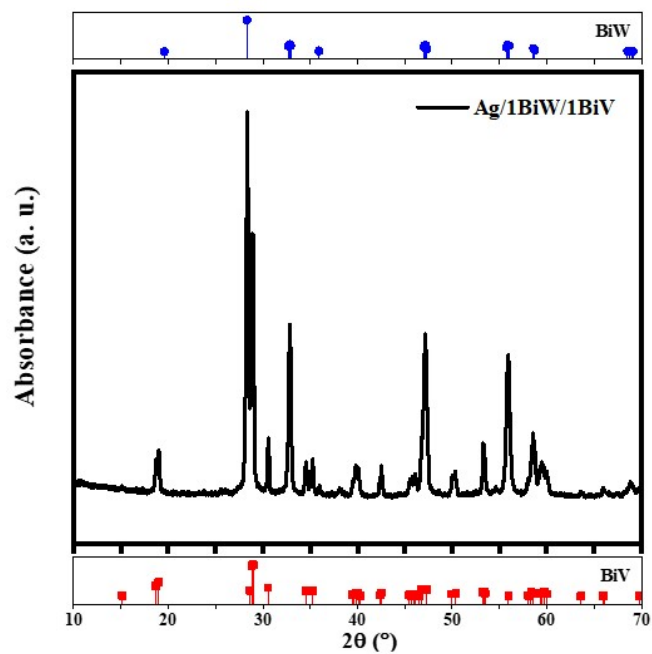

**Fig. S7.** XRD pattern of Ag/1BiW/1BiV recovered from photocatalysis run.

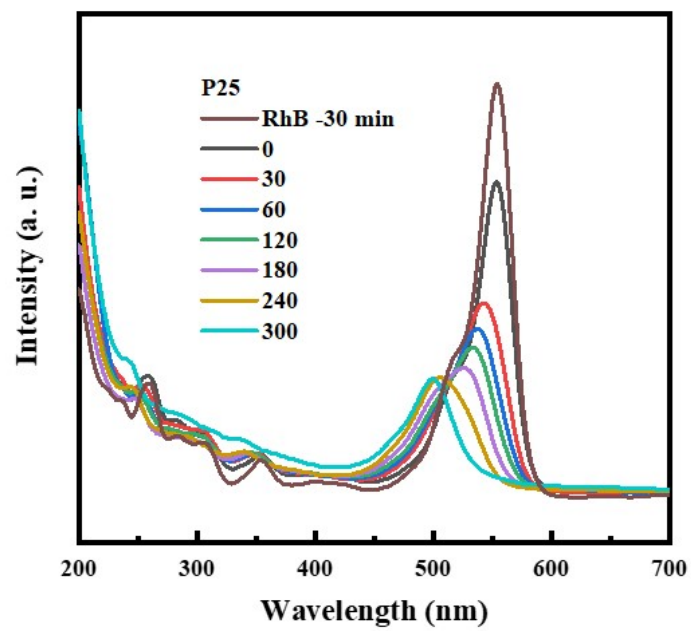

**Fig. S8.** UV-vis spectra of RhB degradation over P25, pH=7.

---

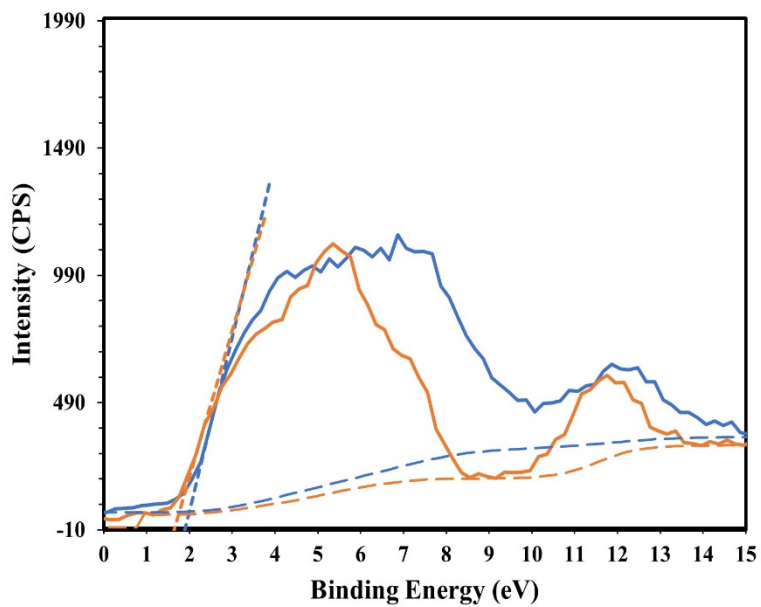

**Fig. S9.** Valence band maxima calculations based on XPS for BiW (blue) and BiV (orange) catalysts. A Tougaard baseline is shown for every catalyst in a dashed line and was used to determine the intercept and calculate the VB maximum. The values determined from the intercept are BiW VB = 2.00 eV; and BiV VB = 1.60 eV.

---
